# Supplementary material
Source: PubMed Central journal article supplement (PMC2856280)

Supplementary Figure 1A

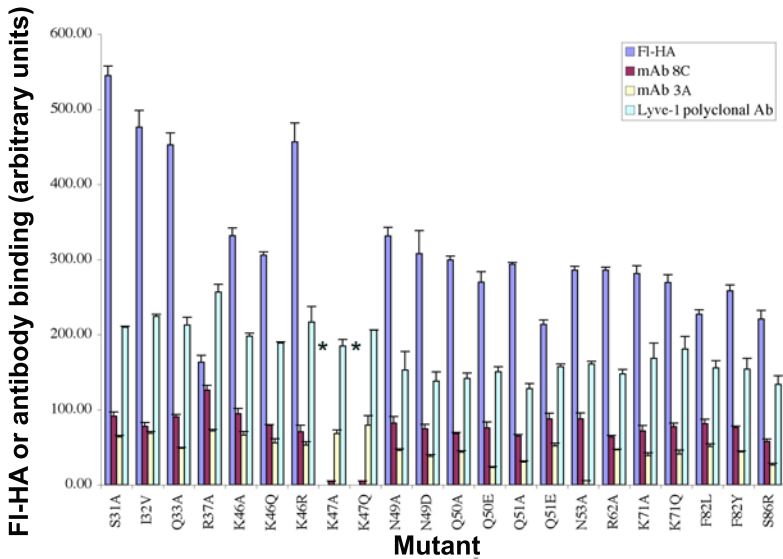

# Supplementary Fig 1B

FI-HA or antibody binding (arbitrary units)

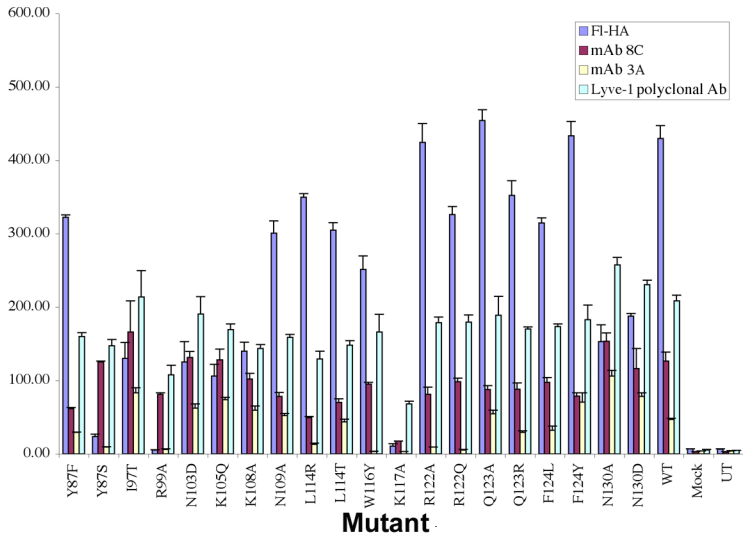

## Moving Average of Residuals for LYVE-1

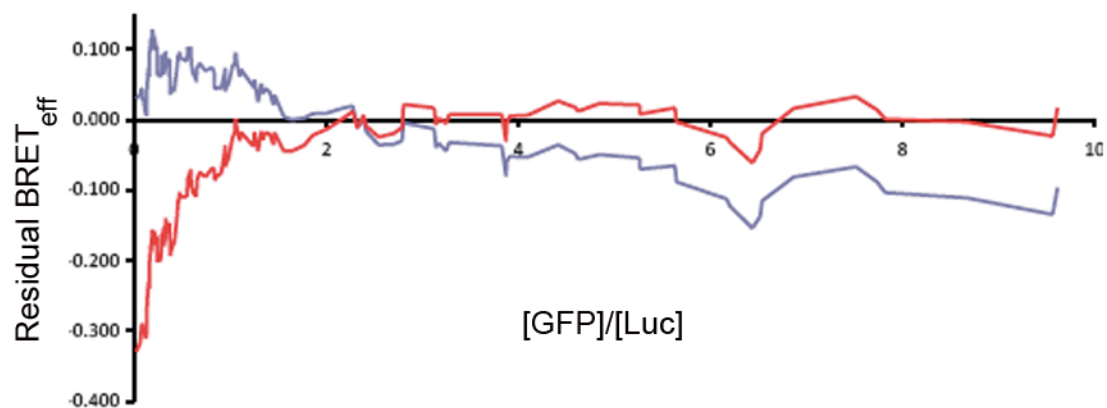

## Moving Average of Residuals for CD44

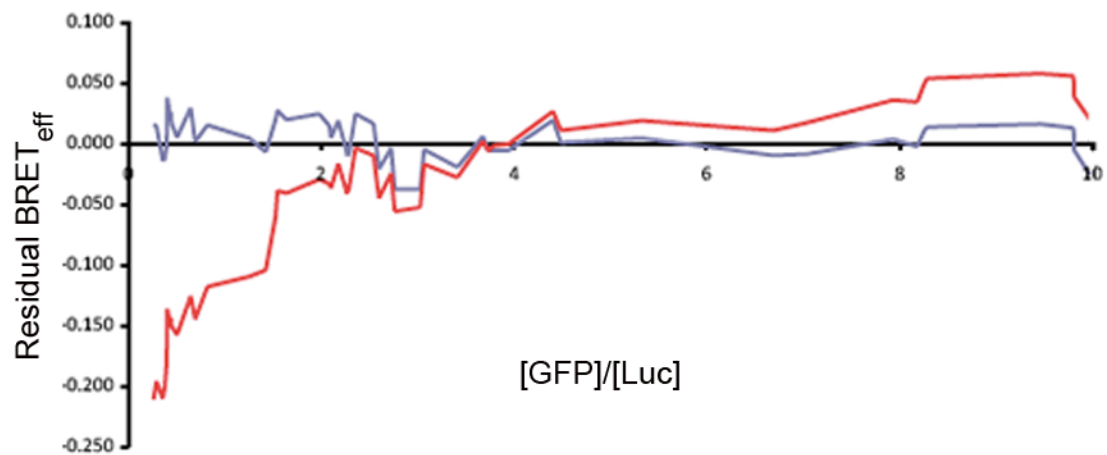

Supplementary Fig 3

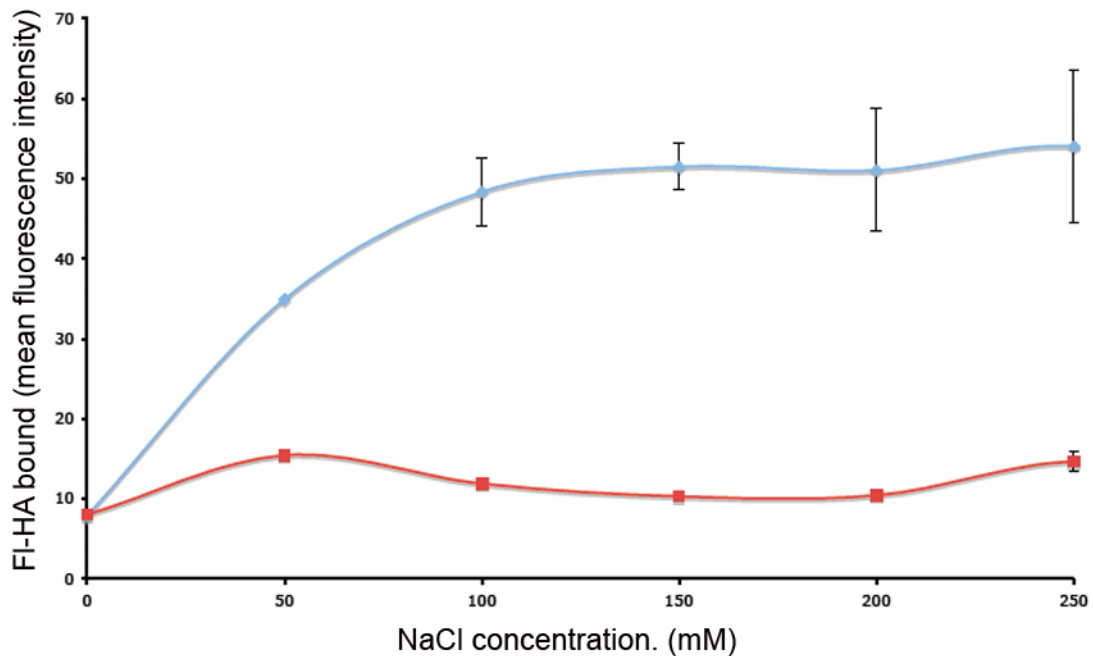

Supplement: supp_M109.047647_jbc.M109.047647-2.pdf [file supp_M109.047647_jbc.M109.047647-2.pdf]
